1 ***Wolbachia* induce cytoplasmic incompatibility and affect mate**  
2 **preference in *Habrobracon hebetor* to increase the chance of its**  
3 **transmission to the next generation**

4  
5  
6 Zeynab Bagheri <sup>a</sup>, Ali Asghar Talebi <sup>a</sup>, Sassan Asgari <sup>b</sup> and Mohammad Mehrabadi <sup>a\*</sup>

7 <sup>a</sup> *Department of Entomology, Faculty of Agriculture, Tarbiat Modares University, Tehran,*  
8 *Iran.*

9 <sup>b</sup> *Australian Infectious Disease Research Centre, School of Biological Sciences, The*  
10 *University of Queensland, Brisbane, QLD, Australia.*

11

12

13

14

15

16

17

18 \*Corresponding authors:

19 Mohammad Mehrabadi, Department of Entomology, Faculty of Agriculture, Tarbiat

20 Modares University, P.O. Box 14115-336, Tehran, Iran.

21 Email: [m.mehrabadi@modares.ac.ir](mailto:m.mehrabadi@modares.ac.ir)

22 Phone: +98 21 4829 2371

23 Fax: +98 21 4829 2200

24 **Abstract**

25 *Wolbachia* are common intracellular bacteria that are generally found in arthropods  
26 including a high proportion of insects and also some nematodes. This intracellular  
27 symbiont can affect sex ratio with a variety of reproductive anomalies in the host,  
28 including cytoplasmic incompatibility (CI) in haplodiploides. In this study, we questioned  
29 if the parasitoid wasp, *Habrobracon hebetor* (Hym.: Braconidae), which is one of the  
30 most important biological control agents of many lepidopteran larvae, is infected with  
31 *Wolbachia*. To test this, DNA was extracted from adult insects and subjected to PCR  
32 using specific primers to *Wolbachia* target genes. The results showed high rate of  
33 *Wolbachia* infection in this parasitoid wasp. To find out the biological function of  
34 *Wolbachia* in *H. hebetor*, we removed this bacterium from the wasps using antibiotic  
35 treatment (cured wasps). Results of the crossing experiments revealed that *Wolbachia*  
36 induced CI in *H. hebetor* in which cured females crossed with infected males produced  
37 only males, while in the progeny of other crosses, both males and females were  
38 observed. Also, our result showed that the presence of *Wolbachia* in the females  
39 increased fecundity and female offspring of this parasitoid wasp. However, the presence  
40 of *Wolbachia* in the males had no significant effect on the fecundity and female  
41 production, but might have incurred costs. We also investigated the effect of *Wolbachia*  
42 on mate choice and found that *Wolbachia* affects mating behavior of *H. hebetor*.  
43 Together, we show that *Wolbachia* induce CI in *H. hebetor* and affect host mating  
44 behavior in favor of its transmission. *Wolbachia* utilize these strategies to increase the  
45 frequency of infected females in the host population.

46 **Keywords:** Cytoplasmic incompatibility, *Habrobracon hebetor*, mating behaviour,  
47 *Wolbachia*,

48

49

## 50 **1. Introduction**

51 *Wolbachia* are endosymbiotic bacteria that infect more than 52% of arthropod species  
52 and also some nematodes. This intracellular symbiont is among the facultative  
53 endosymbionts and can be transferred to the next generation by vertical transmission.  
54 Utilizing different strategies to expand host range is an exceptional feature of *Wolbachia*;  
55 altering sex ratio with a variety of reproductive anomalies in the host (LePage and  
56 Bordenstein, 2013), protection from replication of a variety of pathogens (Hedges et al.,  
57 2008; Pan et al., 2017; Yixin et al., 2013), alteration in behavior (Miller et al., 2010;  
58 Peng et al., 2008; Rohrscheib et al., 2015; Vala et al., 2004) and some metabolic  
59 pathway (Brownlie et al., 2009; Hosokawa et al., 2010) are some of *Wolbachia*' effects  
60 on the host.

61 *Wolbachia* can alter reproductive system via male-killing (Hurst et al., 1999; Jiggins et  
62 al., 1998), feminization in isopods (Rousset et al., 1992), parthenogenesis induction (PI)  
63 in haplodiploid species in which unfertilized eggs become females (Stouthamer et al.,  
64 1990) and importantly cytoplasmic incompatibility (CI) (Yen and Barr, 1971). CI is  
65 commonly expressed when *Wolbachia*-infected males mate with uninfected females  
66 (Unidirectional CI) and also occurs in matings between infected individuals harboring  
67 different strains of *Wolbachia* (Bidirectional CI) (Hunter et al., 2003; O'Neill and Karr,  
68 1990; Perrot-Minnot et al., 1996b). In unidirectional CI crosses, paternal chromatin fails

69 to condense properly in the first cell cycle and line on the metaphase plate during the  
70 first mitosis. Such a cross results in the death of the embryo (Beckmann et al., 2017).  
71 This strategy can be used in the mass production and release of incompatible male  
72 insects to control wild populations of disease vectors such as the mosquito *Culex*  
73 *pipiens* (Laven, 1967) and of agricultural pests such as *Liriomyza trifolii* (Tagami et al.,  
74 2006).

75 It has been reported that *Wolbachia* may have positive effects on the fitness of host. For  
76 example, it was shown that *Wolbachia* increased fecundity in the parasitoid wasp  
77 *Trichogramma bourarachae* (Vavre et al., 1999). It has also been reported that  
78 *Wolbachia* infection positively affects the life history and reproductive traits of  
79 *Callosobruchus chinensis* males and females (Okayama et al., 2016). Given that  
80 parasitoid wasps play an important role in the biological control of insect pests, the  
81 presence of *Wolbachia* can affect their function. Previous studies have reported the  
82 effect of *Wolbachia* on reproduction of some parasitoid wasps; for example, PI-  
83 *Wolbachia* has been reported in *Trichogramma* sp. (Trichogrammatidae) (Stouthamer  
84 and Werren, 1993) and *Encarsia* sp. (Aphelinidae) (Stouthamer and Mak, 2002; Wang  
85 et al., 2017; Zchori-Fein et al., 1992). Also, in the parasitoid wasp *Asobara tabida*  
86 (Braconidae), it has been shown that two strains of *Wolbachia* (i.e. *wAtab1* and *wAtab2*)  
87 induce CI, but *wAtab3* strain is required for the host oogenesis (Dedeine et al., 2005).  
88 CI-*Wolbachia* has been reported from other wasps such as *Aphytis melinus*  
89 (Aphelinidae) (Vasquez et al., 2011) and *Nasonia vitripennis* (Pteromalidae) (Breeuwer  
90 and Werren, 1993).

91 *Habrobracon hebetor* (Hym.: Braconidae) is one of the most important biological control  
92 agents of many lepidopteran larvae, mainly pyralid moths infesting stored products  
93 (Ghimire, 2008). In previous studies, the presence of *Wolbachia* in *H. hebetor* has been  
94 reported (Kageyama et al., 2010); however, the effect of *Wolbachia* on this parasitoid  
95 wasp has not been investigated yet. Therefore, in this study we questioned whether  
96 *Wolbachia* affects the reproduction of *H. hebetor*. Our results indicated the presence of  
97 *Wolbachia* in the population of *H. hebetor* collected from Karaj, Iran. We show that  
98 *Wolbachia* induce CI in *H. hebetor* and affect the wasp mating behavior in favor of  
99 *Wolbachia* transmission.

100

## 101 **2. Materials and Methods**

### 102 2.1. Insects

103 The original population of the *H. hebetor* was collected from Karaj, Iran. The wasps  
104 were reared under the laboratory condition at  $25 \pm 5$  °C,  $60 \pm 5\%$  RH and a photoperiod  
105 of 16:8 h and fed daily with diluted raw honey (90% honey and 10% water). The female  
106 wasps were presented with fifth instar mill moth (*Ephestia kuehniella*) larvae for  
107 oviposition.

108

### 109 2.2. *Wolbachia* detection

110 Total DNA was extracted from single individuals of *H. hebetor* (n=100) using the  
111 previously described procedure (O'Neill et al., 1992). In order to detect *Wolbachia*, the  
112 DNA samples were subjected to PCR by using the specific primers targeting *Wolbachia*  
113 *wsp* gene (Narita et al., 2007). The PCR reactions were conducted under a temperature

114 profile of 95 °C for 5 min, followed by 35 cycles of 95 °C for 30 sec, 56 °C for 30 sec  
115 and 72 °C for 1 min, and a final extension at 72 °C for 10 min. The PCR products were  
116 subjected to agarose (1%) gel electrophoresis. Moreover, to compare *Wolbachia*  
117 density, DNA was extracted from each developmental stage of the wasp including the  
118 egg, larva (1st, 2d, 3th and 4th instar), pupa (3-, 5- and 7-days old), and adult (1-, 15-,  
119 20-days-old males; and 1-, 15-, 20-, 25-, 30-days-old females) as described above.  
120 Concentrations of the DNA samples were measured using a Epoch instrument (BioTek),  
121 and 10 ng from each genomic DNA sample was used for quantitative PCR (qPCR)  
122 using SYBR Green Mix without ROX (Ampliqon) with a Mic real time PCR (BMS) under  
123 the following conditions: 95 °C for 15 min, followed by 45 cycles of 95 °C for 10 sec, 30  
124 sec at the annealing temperature, and 72 °C for 30 sec, followed by the melting curve  
125 (72–95 °C). Specific primers targeting *Wolbachia ftsZ* gene (Kruse et al., 2017) and the  
126 insect *18s rRNA* gene as a reference gene (Karamipour et al., 2016) were used (Table  
127 1). Reactions from three biological replicates were repeated three times.

128

### 129 2.3. Antibiotic treatments

130 To find out the biological function of *Wolbachia* in *H. hebetor*, four isolines (i.e. two  
131 *Wolbachia*-infected ( $W^+$ ) and two uninfected or cured ( $W^-$ )) were generated using  
132 tetracycline treatment (0.2%, w/v with diluted raw honey) for seven days. Thereafter, the  
133 wasps were allowed to lay eggs on the host, mill moth larvae. Tetracycline treatment  
134 was continued for three generations (seven days treatment of young adults per  
135 generation), and the number of 10 wasps were then randomly selected to test for  
136 *Wolbachia* infection using qPCR as described above. After successful removal of

137 *Wolbachia* from the wasps, they were reared for five generations. The resultant adult  
138 wasps from the 8th generation were considered as the uninfected isolines. The infected  
139 isolines were also treated the same; however the antibiotic was not used. The adult  
140 wasps from these isolines were used for the cross-mating experiments.

141

#### 142 2.4. Crossing experiments and assessing the role of *Wolbachia* in *H. hebetor*

143 For the crossing experiments, we collected 100 pupae from the infected and uninfected  
144 isolines and allowed them to emerge. Then, 20 pairs of unmated individuals (virgin)  
145 from these isolines were used for the crossing tests as follow: infected female—infected  
146 male, infected female—uninfected male, uninfected female—infected male and  
147 uninfected female—uninfected male. We counted the number of the resultant eggs, rate  
148 of hatching eggs, numbers of larvae, pupae and offspring during three days after  
149 crossing. We also estimated the sex ratio of the emerged wasps.

150

#### 151 2.5. Effect of *Wolbachia* on *H. hebetor* mate choice

152 In order to investigate the effect of *Wolbachia* on mate choice, we placed virgin infected  
153 or uninfected females individually in 5-cm-diameter cups with two virgin males, one  
154 infected and one uninfected (i.e. a virgin infected female and two virgin males; a virgin  
155 uninfected female and two virgin males). To differentiate between the males, either  
156 infected or uninfected males (equally) were marked with a point on the end of their  
157 wings using a black pen. Forty replicates of each combination were conducted and the  
158 rates of successful mating were counted for 15 min. In successful mating, a female  
159 accepts a male copulation attempt by moving her ovipositor laterally and then remaining

160 immobile. But a female prevents successful mating by walking, knocking the male with  
161 the hind legs, or bending down the abdomen.

162

## 163 2.6. Data analysis

164 *Wolbachia* densities in different developmental stages of *H. hebetor* were compared  
165 using ANOVA followed by Tukey's multiple comparisons test. *Wolbachia* density in the  
166 infected ( $W^+$ ) and the uninfected ( $W^-$ ) parasitoid wasps were compared using unpaired  
167 *t*-test. Comparisons of the mean number of eggs per female wasp within three days in  
168 different crosses were analyzed with Two-way ANOVA followed by Tukey's (HSD) test.  
169 The mean number of eggs, the rate of hatching eggs, and the percentage of pupae  
170 formation, the percentage of progeny emergence and the sex-ratio of progeny  
171 emergence per female in different crosses were compared using Mann-Whitney *U*-test.  
172 The percentage of mating was analyzed using Kruskal-Wallis test. Statistical analyses  
173 were performed using the software SPSS Statistics 17.0 and the graphs were created  
174 by using Graph Pad Prism.

175

## 176 3. Results

### 177 3.1. *Wolbachia* are persistently present during development of *H. hebetor*

178 To detect and estimate *Wolbachia* infection rate, DNA was extracted from 100  
179 individuals (both sexes) of *H. hebetor*. The results showed that all the tested individuals  
180 were infected with *Wolbachia* (Fig. 1A). Also, to estimate the relative density of  
181 *Wolbachia* in different developmental stages of *H. hebetor*, DNA samples of each  
182 developmental stage (i.e. egg, larva, pupa, and adult) were screened by qPCR. We



183 found that *Wolbachia* was present in all the developmental stages of the parasitoid  
184 wasp and its density in the eggs and adults were higher than that of the other stages  
185 (Fig. 1B;  $F_{9, 20} = 70.86$ ,  $P < 0.0001$ ). The density of *Wolbachia* in different larval and  
186 pupal stages showed no significant difference. Also, the result showed that *Wolbachia*  
187 density increased along with the increase in the age of females ( $F_{4, 10} = 556.3$ ,  $P <$   
188  $0.0001$ ), while *Wolbachia* density did not differ significantly among 1-day, 15-day and  
189 20-day-old males (Fig. 1C).

190

### 191 3.2. *Wolbachia* induce cytoplasmic incompatibility in *H. hebetor*

192 To investigate the effect of *Wolbachia* infection on the reproduction and fitness of *H.*  
193 *hebetor*, we created uninfected *H. hebetor* isolines by treating the wasps with  
194 tetracycline. Following confirmation of removal of *Wolbachia* from tetracycline-treated  
195 wasps (Fig. 2A), we tested if the antibiotic treatments affected mitochondria density  
196 (Ballard and Melvin, 2007) and microbiota population (Karamipour et al., 2016) in the  
197 treated wasps and found no significant differences with the control wasps (Fig. S1).  
198 Then, we created four different crosses and analyzed different parameters associated  
199 with reproduction of the wasp. The results of the crosses showed that all the crosses  
200 produced both males and females progeny, except when infected males were crossed  
201 with the uninfected females which resulted in only male progeny (Fig. 2B). It is worth  
202 mentioning that in hymenopterans, sex determination is based on haplodiploidy system.  
203 In other words, males are haploid and females are diploid. Therefore, CI only appears in  
204 the female progeny (Breeuwer and Werren, 1993; Perrot-Minnot et al., 1996a). Our  
205 results also suggest that *Wolbachia* induced CI in the parasitoid wasp, *H. hebetor*.

206 We also compared the number of resultant eggs of the crosses during three days  
207 oviposition. The mean number of eggs within three days per female in infected female-  
208 infected male and infected female-uninfected male crosses was significantly higher than  
209 those of the other two crosses (Fig. 3A). In addition, the rate of egg hatching in  
210 uninfected female-infected male cross was significantly lower than that of other crosses  
211 (Fig. 3B). The rates of pupa formation were not significantly different in different crosses  
212 (Fig. 3C), while the progeny emergence rate of infected female-uninfected male was  
213 significantly higher than that of other crosses (Fig. 3D). Also, the results showed that the  
214 presence of *Wolbachia* in both male and female (i.e. infected female—infected male  
215 cross) significantly increase the progeny emergence rate compared with the absence of  
216 *Wolbachia* (cured female-cured male cross) (Fig. 3D).

217 Moreover, we compared the mean number of eggs per day in each cross. On the first  
218 day, the mean number of eggs in infected female-infected male cross was significantly  
219 higher than that of the other crosses. On the second day, there was no significant  
220 difference among the crosses in term of the mean number of eggs. On the third day,  
221 however, the mean number of eggs in infected female-uninfected male cross was  
222 significantly higher than that of others (Fig. 4, Table 2). Notably, the highest numbers of  
223 progeny females were observed in infected female—infected male and infected  
224 female—uninfected male crosses (Fig. 2B).

225

### 226 3.3. *Wolbachia* affect mate choice in *H. hebetor*

227 In order to investigate the effect of *Wolbachia* on mate choice, we designed a choice  
228 mating test. In this test, two infected and uninfected males were exposed to either an

229 infected or an uninfected female. The results showed that the infected females mated at  
230 a higher rate with infected males compared to the uninfected males (K-W test,  $\chi^2= 5.00$ ,  
231  $P = 0.03$ ). However, there was no difference between mate choices of uninfected  
232 females (K-W test,  $\chi^2= 0.8$ ,  $P = 0.3$ ) (Fig. 5).

233

#### 234 **4. Discussion**

235 *Wolbachia* have evolved several mechanisms of host reproductive manipulations to  
236 increase their worldwide prevalence, including feminization, parthenogenesis, male-  
237 killing, and cytoplasmic incompatibility (CI). These phenotypes, except CI, serve to  
238 increase the frequency of *Wolbachia*-infected females, the transmitting sex of the  
239 bacteria, in a host population as males are an evolutionary dead end for *Wolbachia*  
240 (Hurst and Frost, 2015; Serbus et al., 2008; Werren et al., 2008). The presence  
241 *Wolbachia* has been reported in many insects. Given that *Wolbachia* manipulate  
242 reproductive system of their insect hosts, they have good potential in biological control,  
243 either to control insect pests or to increase the population of biological control agents  
244 and improve their functions.

245 Here, we investigated the effect of *Wolbachia* on the reproductive biology of the  
246 parasitoid wasp *H. hebetor* which is one of the important biological control agents of  
247 many lepidopteran larvae. We detected *Wolbachia* from all the field-collected individuals  
248 of *H. hebetor* and the prevalence rate of infection was 100%. High rate of *Wolbachia*  
249 infection in natural population of *H. hebetor* could be explained by fitness benefit that  
250 *Wolbachia* confers to the wasp. Also, we estimated relative density of *Wolbachia* in  
251 different developmental stages of *H. hebetor* and found that *Wolbachia* densities in the

252 eggs and adult females were higher than other stages of the parasitoid wasps. These  
253 results indicate efficient vertical transmission of *Wolbachia* in this parasitoid wasp.  
254 Developmental-specific densities of *Wolbachia* have also been reported in other insects  
255 such as *Tribolium confusum* (Ming et al., 2015) and *Brontispa longissima* (Ali et al.,  
256 2018) with higher levels in eggs and adults than other stages. *Wolbachia* density in  
257 *Diaphorina citri* (Dossi et al., 2014) and *Drosophila melanogaster* (Goto et al., 2006)  
258 was shown to increase as development proceeds. Considering our results and those  
259 reported from other studies, it can be hypothesized that *Wolbachia* may affect or be  
260 regulated throughout the host development. Moreover, high rate of *Wolbachia*  
261 transmission might be achieved by investing high population of the bacteria within the  
262 host egg.

263 In addition, we investigated the effect of ageing on the *Wolbachia* density in the adult  
264 males and females. The result showed that *Wolbachia* density increased in aged  
265 females that is in congruence to the study that showed *Wolbachia* density increase with  
266 aging in *Laodelphax striatellus* females (Noda et al., 2001). We found no change in  
267 *Wolbachia* density over time in the males. Similar to our results, it has been shown that  
268 *Wolbachia* density in the males of *Tribolium confusum* remains unchanged over time  
269 (Ming et al., 2015). *Wolbachia* are positively associated with CI strength (Bourtzis et al.,  
270 1996; LePage and Bordenstein, 2013; Sinkins et al., 1995). Reduction in *Wolbachia*  
271 density during aging in males has been suggested to be associated with reduction in the  
272 ability to cause CI. This phenomenon has been reported in *Sogatella furcifera* males  
273 (Noda et al., 2001) and *Aedes albopictus* males infected with *wAlbA* strain of  
274 *Wolbachia* (Tortosa et al., 2010). Therefore, based on our results, it could be

275 hypothesized that *Wolbachia*-induced CI increase over time in the female wasps, while  
276 it remains almost constant in the males. Males suffer from fertility reduction in CI  
277 crosses, therefore by removing/reducing the infection during development they may  
278 suppress the expression of CI (Tortosa et al., 2010). In the present study, the density of  
279 *Wolbachia* in 1-day, 15-day and 20-day-old males was almost the same, and it can be  
280 concluded that males prevent *Wolbachia* growth to suppress CI. However, density of  
281 *Wolbachia* increases in females with aging, with 30-day-olds having the highest  
282 bacterial density.

283 Given the high rate of *Wolbachia* infection and their presence during the wasps'  
284 development, we next examined the functional role of *Wolbachia* in this insect. To  
285 assess the effect of *Wolbachia* infection on the reproduction of *H. hebetor*, we designed  
286 four different crosses and found that the infected males crossed with uninfected females  
287 resulted in only male progeny (i.e. incompatible cross). The rates of eggs hatching,  
288 pupa formation and adult emergence of this cross were also lower than that of others.  
289 Two types of CI have been suggested in haplodiploids: female mortality or conversion to  
290 males (Bordenstein et al., 2003). Given low hatching rate and all male progeny in the  
291 incompatible cross of our experiments, the mortality type of CI is suggested for *H.*  
292 *hebetor*. Female mortality has been suggested as the normal and most common type of  
293 CI in haplodiploid insects including parasitoid wasps such as *Nasonia* (Perrot-Minnot et  
294 al., 1996a), *Leptopilina* (Vavre et al., 2000) and *Trichopria* (Vavre et al., 2002), whereas  
295 female conversion to males is an exception (Bordenstein et al., 2003).

296 Our data showed that the presence of *Wolbachia* in the female wasps improved their  
297 fecundity. The number of eggs laid by the infected female wasps was significantly

298 higher in the compatible crosses (i.e. infected female-infected male cross and infected  
299 female-uninfected male cross) compared with the others. Consistent to these results, it  
300 has been reported that *Wolbachia*-infection improves fecundity in *Aedes albopictus*  
301 (Dobson et al., 2004), *Trichogramma* (Vavre et al., 1999), *D. melanogaster* (Fry et al.,  
302 2004) and *Tetranychus urticae* (Zhao et al., 2013). Higher fecundity of the infected  
303 females would increase infected individuals thereby accelerate *Wolbachia* distribution  
304 within the host population.

305 Moreover, our data showed that the compatible crosses transmitting *Wolbachia* to the  
306 next generation had higher reproductive fitness compared to the others. The rates of  
307 egg hatching and progeny emergence in the infected female-uninfected male cross  
308 were significantly higher than those in infected female-infected male cross. In addition,  
309 the number of resultant females from infected female-uninfected male cross was similar  
310 to those produced from infected female—infected male cross. These data suggest that  
311 the presence of *Wolbachia* in the males have no significant effect on fecundity, fertility  
312 and number of female progeny when female is also infected with the same *Wolbachia*.  
313 Therefore, in the compatible crosses transmitting *Wolbachia*, female infection matters  
314 regardless of male infection.

315 Considering the reproductive fitness that *Wolbachia* impose on *H. hebetor*, we  
316 questioned whether that affects mate choice of the female wasp. Our data showed that  
317 infected females chose infected males more frequently than uninfected males.  
318 However, there was no difference in male mate choice of the uninfected females. These  
319 data suggest that *Wolbachia* infection may modify the mate choice of this wasp. In  
320 congruence to these results, it has been reported that in the two-spotted mite,

321 *Tetranychus urticae*, *Wolbachia*-infected females mostly choose infected males to  
322 decrease the chance of CI occurring (Vala et al., 2004). Also, it has been shown that  
323 *Wolbachia* affect reproduction preference and reproduction isolation among different  
324 populations of *D. melanogaster*. This observation may strengthen the hypothesis that  
325 infected females are more attractive to males than their uninfected counterparts. This  
326 active bias could be due to differences in pheromone compounds of infected and  
327 uninfected females that attracts the infected males more than the uninfected males.

328

## 329 **5. Conclusion**

330 In this study we showed that *Wolbachia* were persistently present during development  
331 of the parasitoid wasp, *H. hebetor* highlighting efficient vertical transmission of  
332 *Wolbachia*. Different densities of *Wolbachia* during development of *H. hebetor* may be  
333 due to specific regulatory mechanisms (such as metamorphosis) that allow it to  
334 populate the host at certain stages. By elimination of *Wolbachia* from *H. hebetor* and  
335 conducting crossing experiments, we confirmed that *Wolbachia* induced CI in this wasp  
336 is most probably through killing female embryos in incompatible crosses. Moreover, we  
337 reported that *Wolbachia* affects mate choice and fecundity of *H. hebetor* (in compatible  
338 crosses); thereby incur direct fitness to the host that transmits it to the next generation.  
339 This strategy facilitates *Wolbachia* spread through populations of the host insects.

340

## 341 **Acknowledgements**

342 Works in Our laboratory (M.M.) is supported by grants from Tarbiat Modares University,  
343 National Science Foundation (INSF) and Center for International Scientific Studies and

344 collaboration (CISSC). The authors declare that they have no conflicts of interest with  
345 the contents of this article.

346

### 347 **Authors' contributions**

348 M.M. and Z.B. conceived and designed the experiments. Z.B. performed the  
349 experiments. Z.B. and M.M. and A.A.T. analyzed the data and prepared the figures and  
350 tables. Z.B., S.A. and M.M. wrote the manuscript. All of the authors reviewed the  
351 manuscript.

352

### 353 **References**

- 354 Ali, H., et al., 2018. Infection Density Dynamics and Phylogeny of *Wolbachia* Associated  
355 with Coconut Hispine Beetle, *Brontispa longissima* (Gestro)(Coleoptera:  
356 Chrysomelidae), by Multilocus Sequence Type (MLST) Genotyping. Journal of  
357 Microbiology and Biotechnology. 28, 796-808.
- 358 Ballard, J., Melvin, R., 2007. Tetracycline treatment influences mitochondrial  
359 metabolism and mtDNA density two generations after treatment in *Drosophila*.  
360 Insect molecular biology. 16, 799-802.
- 361 Beckmann, J. F., et al., 2017. A *Wolbachia* deubiquitylating enzyme induces  
362 cytoplasmic incompatibility. Nature Microbiology. 2, 17007.
- 363 Bordenstein, S. R., et al., 2003. Host genotype determines cytoplasmic incompatibility  
364 type in the haplodiploid genus *Nasonia*. Genetics. 164, 223-233.
- 365 Bourtzis, K., et al., 1996. *Wolbachia* infection and cytoplasmic incompatibility in  
366 *Drosophila* species. Genetics. 144, 1063-1073.
- 367 Breeuwer, J., Werren, J. H., 1993. Cytoplasmic incompatibility and bacterial density in  
368 *Nasonia vitripennis*. Genetics. 135, 565-574.



- 369 Brownlie, J. C., et al., 2009. Evidence for metabolic provisioning by a common  
370 invertebrate endosymbiont, *Wolbachia pipientis*, during periods of nutritional  
371 stress. PLoS pathogens. 5, e1000368.
- 372 Dedeine, F., et al., 2005. *Wolbachia* requirement for oogenesis: occurrence within the  
373 genus *Asobara* (Hymenoptera, Braconidae) and evidence for intraspecific  
374 variation in *A. tabida*. Heredity. 95, 394-400.
- 375 Dobson, S., et al., 2004. Fitness advantage and cytoplasmic incompatibility in  
376 *Wolbachia* single-and superinfected *Aedes albopictus*. Heredity. 93, 135-142.
- 377 Dossi, F. C. A., et al., 2014. Population dynamics and growth rates of endosymbionts  
378 during *Diaphorina citri* (Hemiptera, Liviidae) ontogeny. Microbial ecology. 68,  
379 881-889.
- 380 Fry, A., et al., 2004. Variable fitness effects of *Wolbachia* infection in *Drosophila*  
381 *melanogaster*. Heredity. 93, 379-389.
- 382 Ghimire, M. N., 2008. Reproductive performance of the parasitoid *Bracon hebetor* Say  
383 (Hymenoptera: Braconidae) on various host species of Lepidoptera. Oklahoma  
384 State University.
- 385 Goto, S., et al., 2006. Asymmetrical interactions between *Wolbachia* and Spiroplasma  
386 endosymbionts coexisting in the same insect host. Applied and environmental  
387 microbiology. 72, 4805-4810.
- 388 Hedges, L. M., et al., 2008. *Wolbachia* and virus protection in insects. Science. 322,  
389 702-702.
- 390 Hosokawa, T., et al., 2010. *Wolbachia* as a bacteriocyte-associated nutritional mutualist.  
391 Proceedings of the National Academy of Sciences. 107, 769-774.
- 392 Hunter, M. S., et al., 2003. A bacterial symbiont in the Bacteroidetes induces  
393 cytoplasmic incompatibility in the parasitoid wasp *Encarsia pergandiella*.  
394 Proceedings of the Royal Society of London B: Biological Sciences. 270, 2185-  
395 2190.

- 396 Hurst, G. D., Frost, C. L., 2015. Reproductive parasitism: maternally inherited symbionts  
397 in a biparental world. *Cold Spring Harbor perspectives in biology*. 7, a017699.
- 398 Hurst, G. D., et al., 1999. Male-killing *Wolbachia* in two species of insect. *Proceedings*  
399 *of the Royal Society of London B: Biological Sciences*. 266, 735-740.
- 400 Jiggins, F. M., et al., 1998. Sex ratio distortion in *Acraea encedon* (Lepidoptera:  
401 Nymphalidae) is caused by a male-killing bacterium. *Heredity*. 81, 87-91.
- 402 Kageyama, D., et al., 2010. Detection and identification of *Wolbachia* endosymbionts  
403 from laboratory stocks of stored-product insect pests and their parasitoids.  
404 *Journal of stored products research*. 46, 13-19.
- 405 Karamipour, N., et al., 2016. Gammaproteobacteria as essential primary symbionts in  
406 the striped shield bug, *Graphosoma lineatum* (Hemiptera: Pentatomidae).  
407 *Scientific reports*. 6, 33168.
- 408 Koukou, K., et al., 2006. Influence of antibiotic treatment and *Wolbachia* curing on  
409 sexual isolation among *Drosophila melanogaster* cage populations. *Evolution*.  
410 60, 87-96.
- 411 Kruse, A., et al., 2017. Combining omics and microscopy to visualize interactions  
412 between the Asian citrus psyllid vector and the Huanglongbing pathogen  
413 *Candidatus Liberibacter asiaticus* in the insect gut. *PloS one*. 12, e0179531.
- 414 Laven, H., 1967. Eradication of *Culex pipiens fatigans* through cytoplasmic  
415 incompatibility. *Nature*. 216, 383-384.
- 416 LePage, D., Bordenstein, S. R., 2013. *Wolbachia*: can we save lives with a great  
417 pandemic? *Trends in parasitology*. 29, 385-393.
- 418 Miller, W. J., et al., 2010. Infectious speciation revisited: impact of symbiont-depletion  
419 on female fitness and mating behavior of *Drosophila paulistorum*. *PLoS*  
420 *Pathogens*. 6, e1001214.
- 421 Ming, Q.-L., et al., 2015. *Wolbachia* infection dynamics in *Tribolium confusum*  
422 (Coleoptera: Tenebrionidae) and their effects on host mating behavior and  
423 reproduction. *Journal of economic entomology*. 108, 1408-1415.

- 424 Narita, S., et al., 2007. Naturally occurring single and double infection with *Wolbachia*  
425 strains in the butterfly *Eurema hecabe*: transmission efficiencies and population  
426 density dynamics of each *Wolbachia* strain. *FEMS microbiology ecology*. 61,  
427 235-245.
- 428 Noda, H., et al., 2001. Infection density of *Wolbachia* and incompatibility level in two  
429 planthopper species, *Laodelphax striatellus* and *Sogatella furcifera*. *Insect*  
430 *biochemistry and molecular biology*. 31, 727-737.
- 431 O'Neill, S. L., et al., 1992. 16S rRNA phylogenetic analysis of the bacterial  
432 endosymbionts associated with cytoplasmic incompatibility in insects.  
433 *Proceedings of the National Academy of Sciences*. 89, 2699-2702.
- 434 O'Neill, S. L., Karr, T. L., 1990. Bidirectional incompatibility between conspecific  
435 populations of *Drosophila simulans*. *Nature*. 348, 178.
- 436 Okayama, K., et al., 2016. Costs and benefits of symbiosis between a bean beetle and  
437 *Wolbachia*. *Animal Behaviour*. 119, 19-26.
- 438 Pan, X., et al., 2017. The bacterium *Wolbachia* exploits host innate immunity to  
439 establish a symbiotic relationship with the dengue vector mosquito *Aedes*  
440 *aegypti*. *The ISME journal*. 12, 277.
- 441 Peng, Y., et al., 2008. *Wolbachia* infection alters olfactory-cued locomotion in  
442 *Drosophila* spp. *Applied and environmental microbiology*. 74, 3943-3948.
- 443 Perrot-Minnot, M.-J., et al., 1996a. Single and double infections with *Wolbachia* in the  
444 parasitic wasp *Nasonia vitripennis* effects on compatibility. *Genetics*. 143, 961-  
445 972.
- 446 Perrot-Minnot, M., et al., 1996b. Double and single *Wolbachia* infections in *Nasonia*  
447 *vitripennis*. *Genetics*. 143, 961-972.
- 448 Rohrscheib, C. E., et al., 2015. *Wolbachia* influences the production of octopamine and  
449 affects *Drosophila* male aggression. *Applied and environmental microbiology*. 81,  
450 4573-4580.

- 451 Rousset, F., et al., 1992. *Wolbachia* endosymbionts responsible for various alterations  
452 of sexuality in arthropods. Proceedings of the Royal Society of London B:  
453 Biological Sciences. 250, 91-98.
- 454 Serbus, L. R., et al., 2008. The genetics and cell biology of *Wolbachia*-host interactions.  
455 Annual review of genetics. 42, 683-707.
- 456 Sinkins, S., et al., 1995. *Wolbachia pipientis*: bacterial density and unidirectional  
457 cytoplasmic incompatibility between infected populations of *Aedes albopictus*.  
458 Experimental parasitology. 81, 284-291.
- 459 Stouthamer, R., et al., 1990. Antibiotics cause parthenogenetic *Trichogramma*  
460 (Hymenoptera/Trichogrammatidae) to revert to sex. Proceedings of the National  
461 Academy of Sciences. 87, 2424-2427.
- 462 Stouthamer, R., Mak, F., 2002. Influence of antibiotics on the offspring production of the  
463 *Wolbachia*-infected parthenogenetic parasitoid *Encarsia formosa*. Journal of  
464 invertebrate pathology. 80, 41-45.
- 465 Stouthamer, R., Werren, J. H., 1993. Microbes associated with parthenogenesis in  
466 wasps of the genus *Trichogramma*. Journal of Invertebrate Pathology. 61, 6-9.
- 467 Tagami, Y., et al., 2006. *Wolbachia*-induced cytoplasmic incompatibility in *Liriomyza*  
468 *trifolii* and its possible use as a tool in insect pest control. Biological Control. 38,  
469 205-209.
- 470 Tortosa, P., et al., 2010. *Wolbachia* age-sex-specific density in *Aedes albopictus*: a host  
471 evolutionary response to cytoplasmic incompatibility? PLoS One. 5, e9700.
- 472 Vala, F., et al., 2004. *Wolbachia* affects oviposition and mating behaviour of its spider  
473 mite host. Journal of evolutionary biology. 17, 692-700.
- 474 Vasquez, C. J., et al., 2011. Discovery of a CI-inducing *Wolbachia* and its associated  
475 fitness costs in the biological control agent *Aphytis melinus* DeBach  
476 (Hymenoptera: Aphelinidae). Biological Control. 58, 192-198.

- 477 Vavre, F., et al., 2000. Evidence for female mortality in *Wolbachia*-mediated cytoplasmic  
478 incompatibility in haplodiploid insects: epidemiologic and evolutionary  
479 consequences. *Evolution*. 54, 191-200.
- 480 Vavre, F., et al., 2002. Infection polymorphism and cytoplasmic incompatibility in  
481 Hymenoptera-*Wolbachia* associations. *Heredity*. 88, 361.
- 482 Vavre, F., et al., 1999. Phylogenetic status of a fecundity-enhancing *Wolbachia* that  
483 does not induce thelytoky in *Trichogramma*. *Insect molecular biology*. 8, 67-72.
- 484 Wang, X.-X., et al., 2017. Incomplete removal of *Wolbachia* with tetracycline has two-  
485 edged reproductive effects in the thelytokous wasp *Encarsia formosa*  
486 (Hymenoptera: Aphelinidae). *Scientific Reports*. 7.
- 487 Weinert, L. A., et al., 2015. The incidence of bacterial endosymbionts in terrestrial  
488 arthropods. *Proc. R. Soc. B*. 282, 20150249.
- 489 Werren, J. H., et al., 2008. *Wolbachia*: master manipulators of invertebrate biology.  
490 *Nature Reviews Microbiology*. 6, 741.
- 491 Yen, J. H., Barr, A. R., 1971. New hypothesis of the cause of cytoplasmic incompatibility  
492 in *Culex pipiens* L. *Nature*. 232, 657-658.
- 493 Yixin, H. Y., et al., 2013. *Wolbachia*-associated bacterial protection in the mosquito  
494 *Aedes aegypti*. *PLoS neglected tropical diseases*. 7, e2362.
- 495 Zchori-Fein, E., et al., 1992. Male production induced by antibiotic treatment in *Encarsia*  
496 *formosa* (Hymenoptera: Aphelinidae), an asexual species. *Experientia*. 48, 102-  
497 105.
- 498 Zhao, D.-X., et al., 2013. *Wolbachia*-host interactions: host mating patterns affect  
499 *Wolbachia* density dynamics. *PLoS One*. 8, e66373.

500

501

502

503

504

505

506

507

508

509

510

511

512

513

514 **Figure legends**

515 **Fig. 1. Detection of *Wolbachia* and their density fluctuations during development**

516 **of *H. hebetor*.** A: A representative diagnostic PCR of *Wolbachia* in adults of *H. hebetor*

517 collected from Karaj using *wsp* primers. C<sup>-</sup>, negative control lacking DNA sample. B:

518 Quantitative PCR (qPCR) detection of *ftsZ* gene of *Wolbachia* during development of *H.*

519 *hebetor*. C: Effect of aging on *Wolbachia* density in female and male adult of *H. hebetor*.

520

521 **Fig. 2. Confirmation of *Wolbachia* removal and the effect of *Wolbachia* on progeny**

522 **sex ratio.** A: Antibiotic treatment resulted in *Wolbachia* elimination in *H. hebetor*. qPCR

523 analysis of *Wolbachia* density in the *Wolbachia* infected ( $W^+$ ) and the *Wolbachia* cured

524 ( $W^-$ ) parasitoid wasps. \*\*\*  $P < 0.001$ . B: Sex ratio of the offspring resulted from different

525 crosses during three days oviposition. Each data point represents a total number of  
526 female offspring produced per female during three days. Female (F), Male (M),  
527 *Wolbachia*-infected ( $W^+$ ) and *Wolbachia*-cured ( $W^-$ ). Mann-Whitney *U* test, \*\*\* signifies  
528  $P < 0.001$ .

529

530 **Fig. 3. Comparison of biological parameters of *H. hebetor* in different crosses.** A:  
531 Comparison of the mean number of eggs per female. B: The rate of hatching. C: The  
532 percentage of pupae formation. D: The percentage progeny emergence in different  
533 crosses. Female (F), Male (M), *Wolbachia*-infected ( $W^+$ ) and *Wolbachia*-cured ( $W^-$ ).  
534 Each data point represents a sum of data obtained per female during three days.  
535 Mann-Whitney *U* test, \*signifies  $P < 0.05$ , \*\*signifies  $P < 0.01$ , \*\*\* signifies  $P < 0.001$ .

536

537 **Fig. 4. Comparison of the mean number of eggs per female in three days in**  
538 **different crosses.** Each data point represents a number of eggs per female. Means  
539 were compared by Tukey's (HSD) test. Day (D), *Wolbachia* infected ( $W^+$ ) and *Wolbachia*  
540 cured ( $W^-$ ). \*signifies  $P < 0.05$ , \*\*signifies  $P < 0.01$ , \*\*\* signifies  $P < 0.001$ , \*\*\*\* signifies  
541  $P < 0.0001$

542

543 **Fig. 5. Effect of *Wolbachia* on female mate choice.** Female (F), Male (M), *Wolbachia*  
544 infected ( $W^+$ ) and *Wolbachia*-cured ( $W^-$ ). Kruskal-Wallis (K-W) test, \* signifies  $P < 0.05$ .

545

546

547

548

549

**Table 1.** Primers used in this study.

| Target gene | Primer             | Primer sequence (5' -3') | Fwd./Rev | Annealing temp. (°C) | Ref.                      |
|-------------|--------------------|--------------------------|----------|----------------------|---------------------------|
| <i>wsp</i>  | wsp81F             | TGGTCCAATAAGTGATGAAGAAAC | Fwd.     | 56                   | (Narita et al., 2007)     |
|             | wsp691R            | AAAAATTAACGCTACTCCA      | Rev.     |                      |                           |
| 18s rRNA    | penta-18srRNA-F    | CCTGCGGCTTAATTTGACTC     | Fwd.     | 57                   | (Karamipour et al., 2016) |
|             | penta-18srRNA-R    | AACTAAGAACGGCCATGCAC     | Rev.     |                      |                           |
| <i>FtsZ</i> | <i>ftsZ</i> -F(RT) | AGCAGCCAGAGAAGCAAGAG     | Fwd.     | 57                   | (Kruse et al., 2017)      |
|             | <i>ftsZ</i> -R(RT) | TACGTCGCACACCTTCAAAA     | Rev.     |                      |                           |

550

551

552

553

554

555

**Table 2.** Analysis of Variance (ANOVA). The effect of day on number of eggs in different crosses in *H. hebetor*.

|             | P    | Df | F     |
|-------------|------|----|-------|
| Day         | **** | 2  | 34.50 |
| Cross       | **** | 3  | 9.02  |
| Day × Cross | **** | 6  | 7.01  |

\*\*\*\* signifies  $P < 0.0001$ .

556

557

558

559

560

561

562



Fig. 1

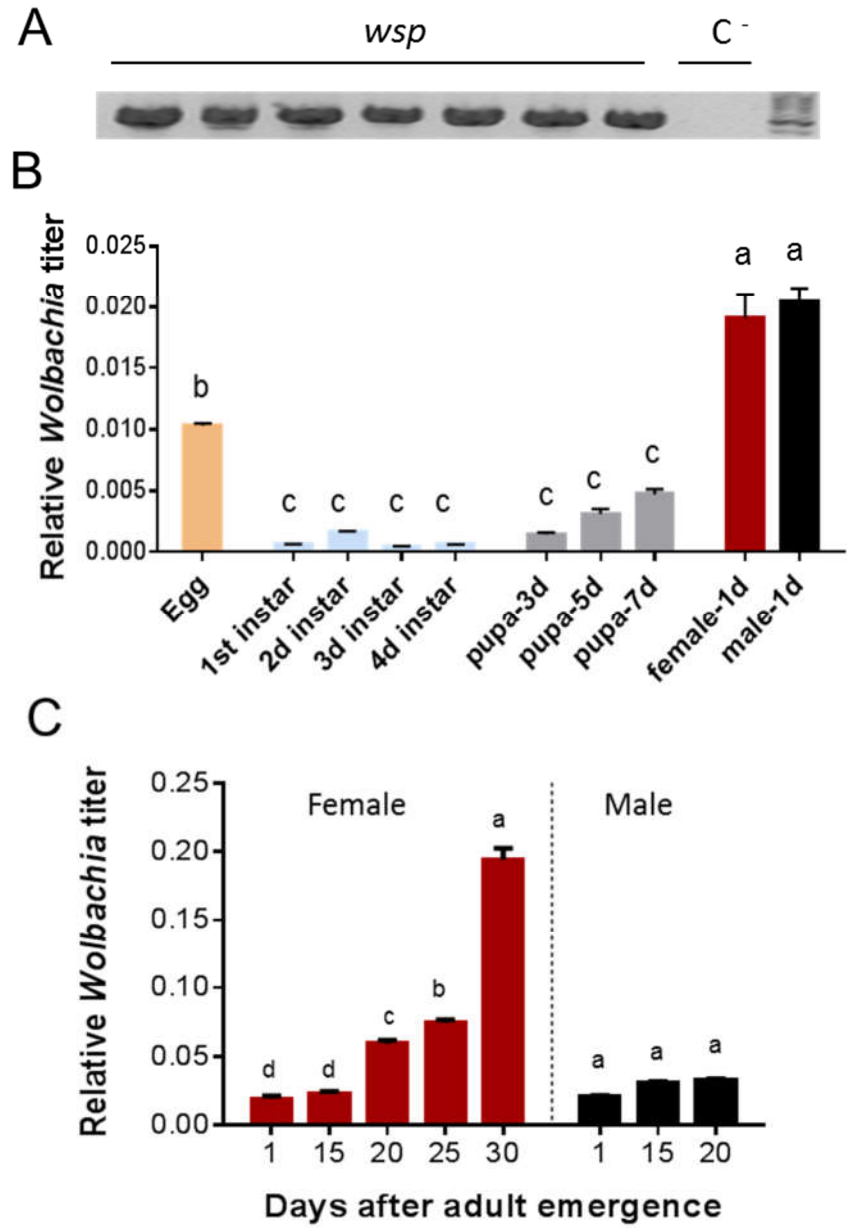

563

564

565

566

567

568

569

570 *Fig. 2*

571

572

573

574

575

576

577

578

579

580

581

582

583

584

585

586

587

**A**

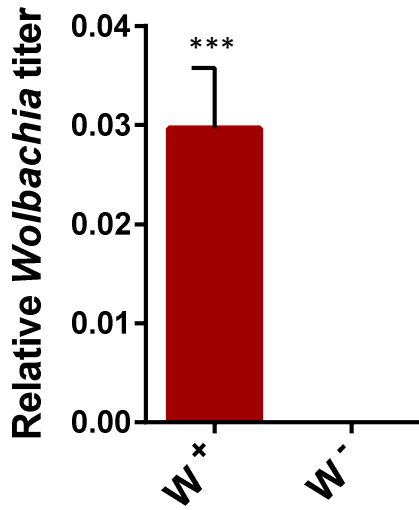

**B**

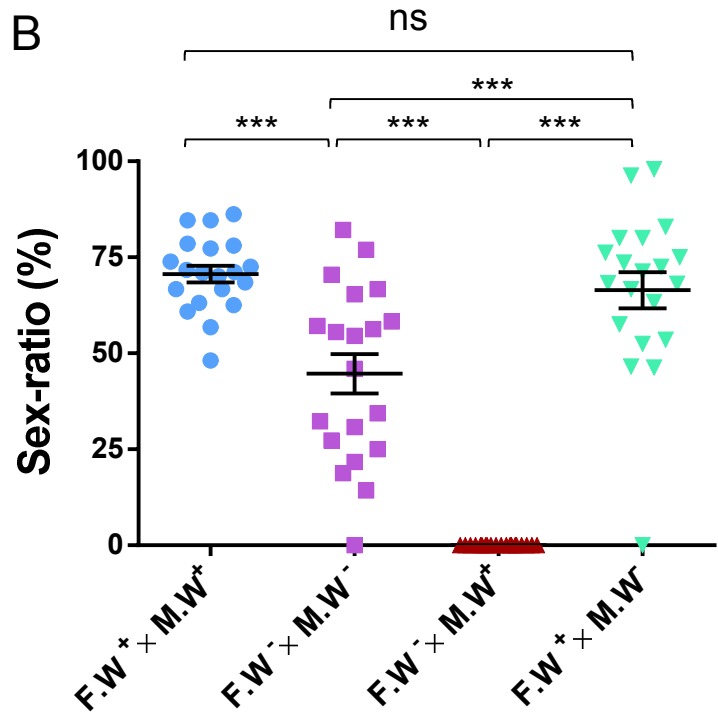

588

589

Fig. 3

590

591

592

593

594

595

596

597

598

599

600

601

602

603

604

605

606

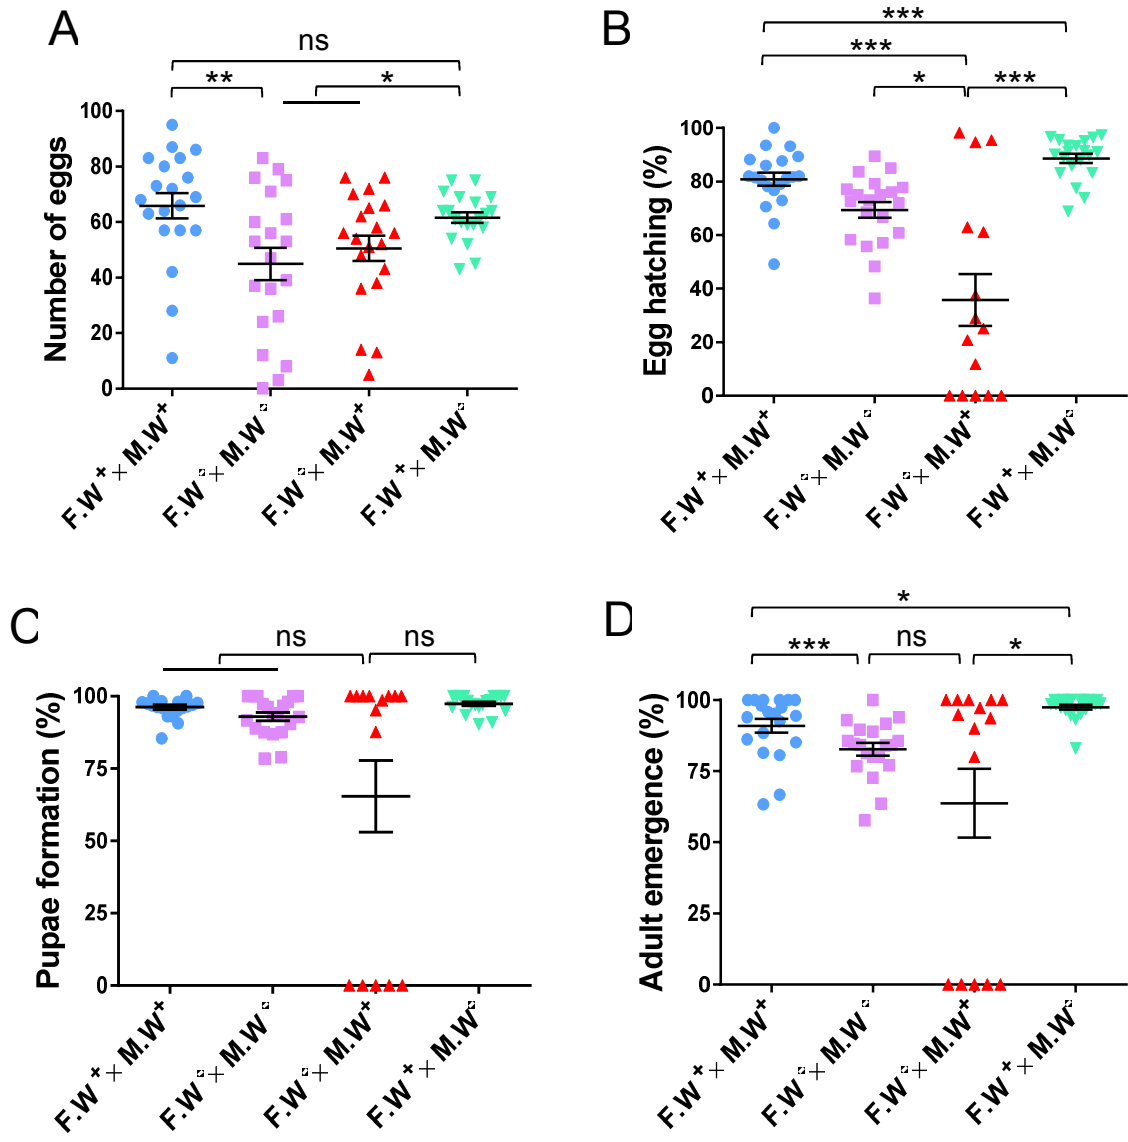

607 *Fig. 4*

608

609

610

611

612

613

614

615

616

617

618

619

620

621

622

623

624

625

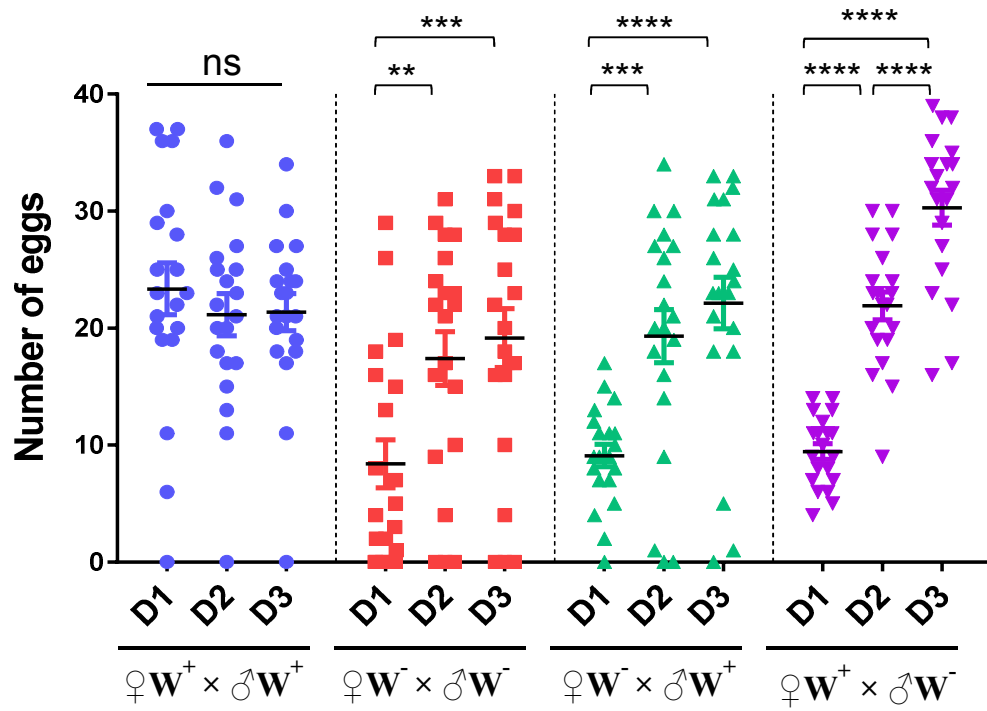

626

627 *Fig. 5*

628

629

630

631

632

633

634

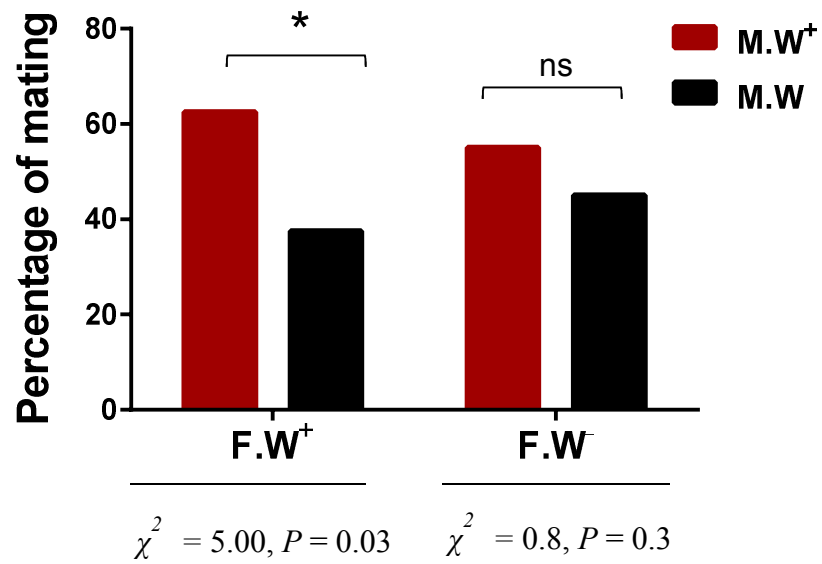

635

636

637

638

639

640

641

642

643

644

Fig. S1

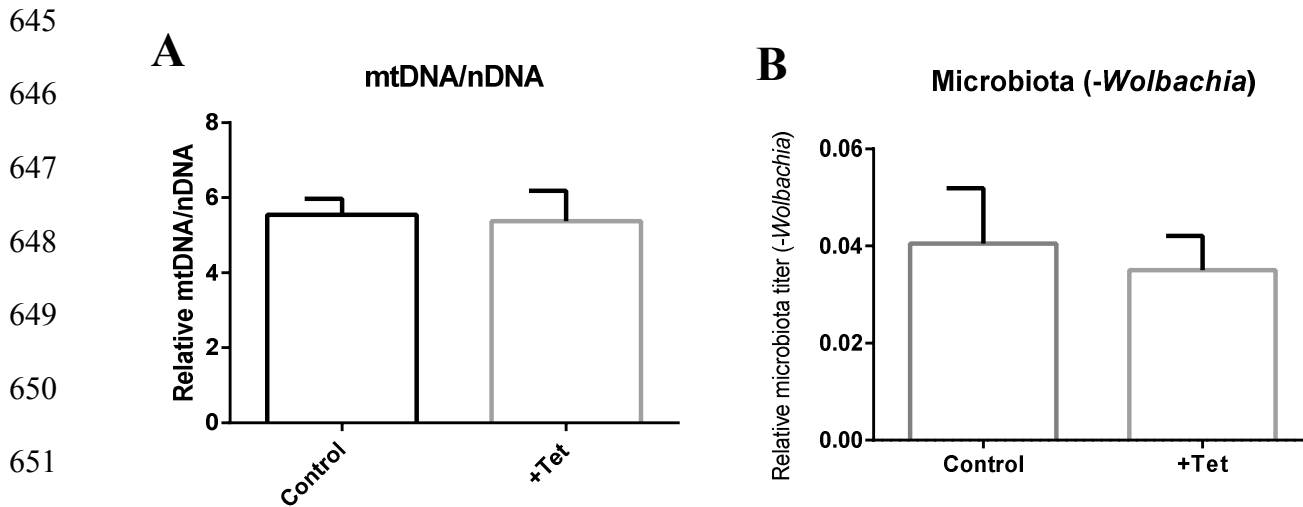

655 Fig. S1. Effect of tetracycline treatment on (A) mitochondria density and (B)  
656 microbiota population of *H. hebetor* (8<sup>th</sup> generation after treatment). There was no  
657 significant differences between the control and treated wasps.

658
